# Supplementary material for: Identifying farnesoid X receptor agonists by naïve Bayesian and recursive partitioning approaches
Source: Royal Society of Chemistry journal article supplement (doi:10.1039/c5md00149h), 2015-01-01
Supplement: c5md00149h2.pdf [file c5md00149h2.pdf]

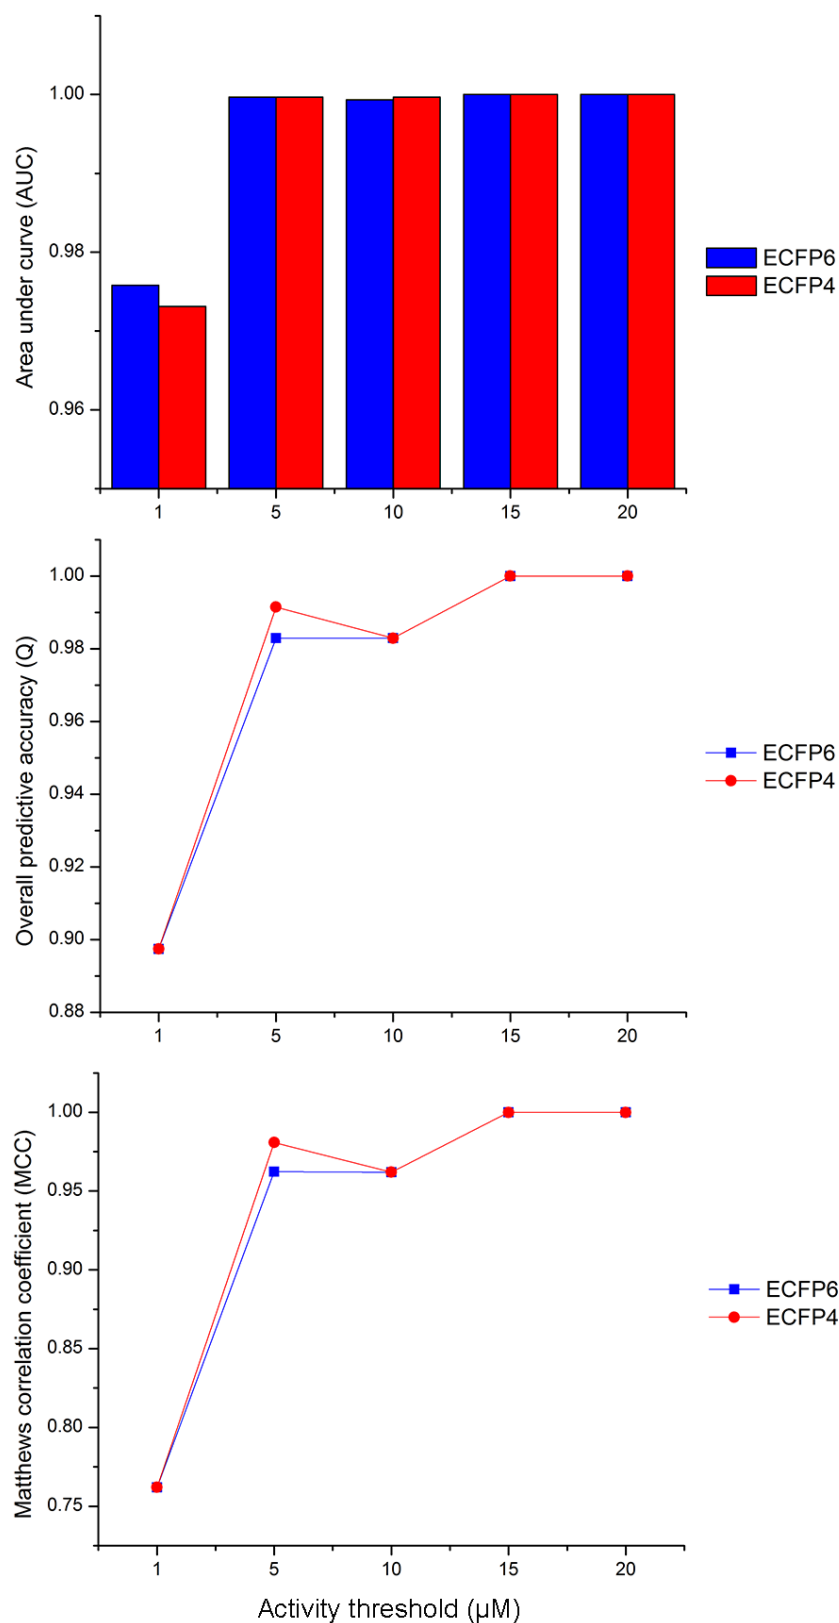

**Fig S1.** The performance of the naïve Bayesian models at different activity thresholds. ECFP6 and ECFP4 represent the fingerprints using for building models. According to these results, all the values suddenly increase and stabilize after 5  $\mu\text{M}$ . Therefore, 5  $\mu\text{M}$  is the reasonable activity threshold.

**Table S1.** The details of performance parameters for the best RP models with the combination of different fingerprints and MPs.

| Models                               | Training set |          |       | Test set |          |       |
|--------------------------------------|--------------|----------|-------|----------|----------|-------|
|                                      | $Q_a$        | $Q_{na}$ | $Q$   | $Q_a$    | $Q_{na}$ | $Q$   |
| MP <sup>a</sup> _depth6 <sup>b</sup> | 0.461        | 0.890    | 0.671 | 0.406    | 0.774    | 0.573 |
| ECFP_4_depth4+MP                     | 0.870        | 0.967    | 0.938 | 0.971    | 0.940    | 0.949 |
| ECFP_6_depth4+MP                     | 0.848        | 0.971    | 0.932 | 0.944    | 0.951    | 0.949 |
| EPFP_4_depth3+MP                     | 0.789        | 0.978    | 0.912 | 0.756    | 0.944    | 0.872 |
| EPFP_6_depth4+MP                     | 0.841        | 0.971    | 0.929 | 0.875    | 0.961    | 0.932 |
| FCFP_4_depth3+MP                     | 0.880        | 0.971    | 0.943 | 0.925    | 0.987    | 0.966 |
| FCFP_6_depth3+MP                     | 0.880        | 0.971    | 0.943 | 0.925    | 0.987    | 0.966 |
| FPFP_4_depth5+MP                     | 0.835        | 0.975    | 0.929 | 0.814    | 0.959    | 0.906 |
| FPFP_6_depth3+MP                     | 0.769        | 0.961    | 0.895 | 0.857    | 0.973    | 0.932 |
| LCFP_4_depth3+MP                     | 0.842        | 0.975    | 0.932 | 0.872    | 0.949    | 0.923 |
| LCFP_6_depth3+MP                     | 0.836        | 0.979    | 0.932 | 0.875    | 0.961    | 0.932 |
| LPFP_4_depth3+MP                     | 0.839        | 0.967    | 0.926 | 0.923    | 0.974    | 0.957 |
| LPFP_6_depth3+MP                     | 0.855        | 0.967    | 0.932 | 0.923    | 0.974    | 0.957 |

<sup>a</sup>MP: the 13 descriptors calculated with DS 2.5.5. <sup>b</sup>Depth\*: the best tree depth for the corresponding model.

**Table S2.** The details of performance parameters for the best RP and NB models

| Models                                         | Training set |          |       | Test set |          |       |
|------------------------------------------------|--------------|----------|-------|----------|----------|-------|
|                                                | $Q_a$        | $Q_{na}$ | $Q$   | $Q_a$    | $Q_{na}$ | $Q$   |
| RP_FCFP_4_depth3 <sup>b</sup> +MP <sup>a</sup> | 0.880        | 0.971    | 0.943 | 0.925    | 0.987    | 0.966 |
| RP_FCFP_6_depth3+MP                            | 0.880        | 0.971    | 0.943 | 0.925    | 0.987    | 0.966 |
| NB_FPFP_6+MP                                   | 0.893        | 0.992    | 0.960 | 0.974    | 1.000    | 0.991 |
| NB_FPFP_10+MP                                  | 0.870        | 0.992    | 0.952 | 0.974    | 1.000    | 0.991 |

<sup>a</sup>MP: the 13 descriptors calculated with DS 2.5.5. <sup>b</sup>Depth\*: the best tree depth for the corresponding model.

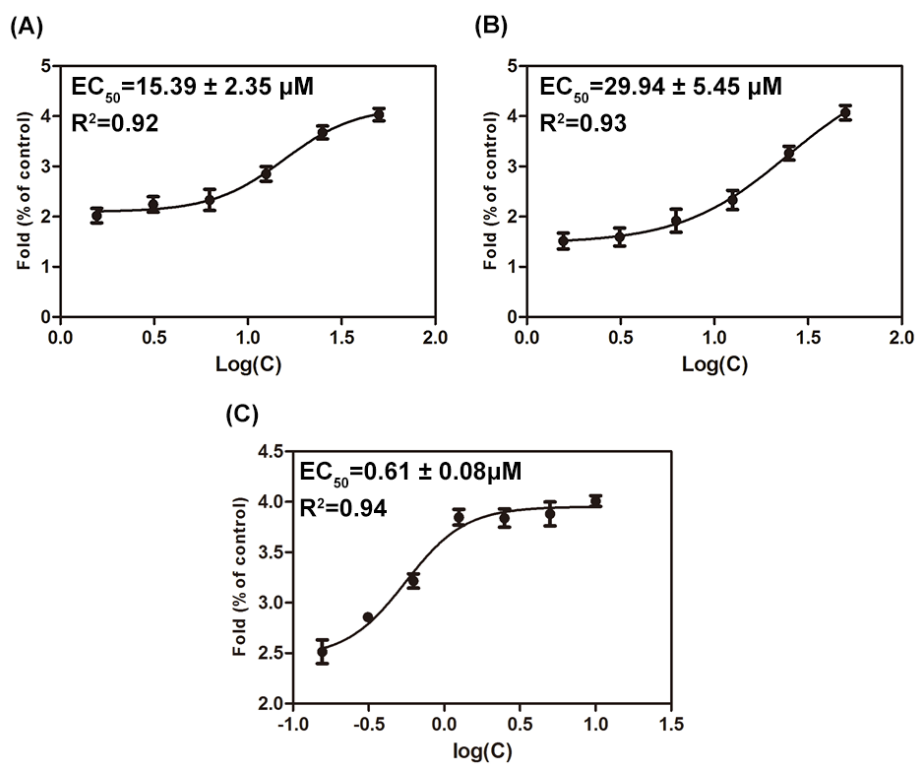

**Fig S2.** The activation curves of compound 10 (A), compound 13 (B) and GW4064 (C). The  $EC_{50}$  values are presented as the mean  $\pm$  SE.
